# Supplementary material for: Concerning the Question: Does Quantum Mechanics Predict Molecular Structure? An Examination of the Energetics
Source: Research Square preprint supplement (doi:10.21203/rs.3.rs-7989844/v1), 2026-02-16
Supplement: Supplementary file 1 [file 946a71e8e5cc7a8bc8f81211.xlsx]

## Sheet: Sheet1
	H	1312									7872
	C	1086.5	2352.6	4620.5	6222.7	37831	47277				198781
	O	1313.9	3388.3	5300.5	7469.2	10989.5	13326.5	71330	84078		197196
											403848
											403848		184		404032
													235		404084

## Sheet: Sheet2
		Enthalpy change of the Dimethyl ether (DME) Quantum Hamiltonian										Enthalpy change of the Ethanol (EtOH) Quantum Hamiltonian
				DQu_HamH	-407023	kJmol–1								DQu_HamH	-407116	kJmol–1
					Enthalpy	Stoichiometry									Enthalpy	Stoichiometry
			2 C6+(g) 6 H+(g) O8+(g) 26e–		kJmol–1								2 C6+(g) 6 H+(g) O8+(g) 26e–		kJmol–1
																					D Enthalpy Change between formation	Stoic.
		ionisation of H	DIEH		1312	6	7872					ionisation of H	DIEH		1312	6	7872				of dimethyl ether and ethanol	C	2
			2 C6+(g) 6 +(g) O8+(g) 20e–										2 C6+(g) 6 H(g) O8+(g) 20e–								from gas phase nuclei and electrons,	H	6
																					as a percentage difference:	O	1
		8th ionisation of O	D8th_IEH		84078	1	84078					8th ionisation of O	D8th_IEH		84078	1	84078
			2 C6+(g) 6 H(g) O7+(g) 19e–										2 C6+(g) 6 H(g) O7+(g) 19e–								0.000228535
																					0.000228535
		7th ionisation of O	D7th_IEH		71330	1	71330					7th ionisation of O	D7th_IEH		71330	1	71330
			2 C6+(g) 6 H(g) O6+(g) 18e–										2 C6+(g) 6 H(g) O6+(g) 18e–
		6th ionisation of O	D6th_IEH		13326.5	1	13326.5					6th ionisation of O	D6th_IEH		13326.5	1	13326.5				ev Electron Volts)
			2 C6+(g) 6 H(g) O5+(g) 17e–										2 C6+(g) 6 H(g) O5+(g) 17e–
																					CH3OCH3
		5th ionisation of O	D5th_IEH		10989.5	1	10989.5					5th ionisation of O	D5th_IEH		10989.5	1	10989.5				-4218.22
			2 C6+(g) 6 H(g) O4+(g) 16e–										2 C6+(g) 6 H(g) O4+(g) 16e–
																					CH3CH2OH
		4th ionisation of O	D4th_IEH		7469.2	1	7469.2					4th ionisation of O	D4th_IEH		7469.2	1	7469.2				-4219.18
			2 C6+(g) 6 H(g) O3+(g) 15e–										2 C6+(g) 6 H(g) O3+(g) 15e–
		3rd ionisation of O	D3rd_IEH		5300.5	1	5300.5					3rd ionisation of O	D3rd_IEH		5300.5	1	5300.5
			2 C6+(g) 6 H(g) O2+(g) 14e–										2 C6+(g) 6 H(g) O2+(g) 14e–								Ratio: DME to Ethanol
		2nd ionisation of O	D2nd_IEH		3388.3	1	3388.3					2nd ionisation of O	D2nd_IEH		3388.3	1	3388.3				0.999771
			2 C6+(g) 6 H(g) O(g) 13e–										2 C6+(g) 6 H(g) O(g) 13e–								1.00023
									DME										EtOH
		1st ionisation of O	D1st_IEH		1313.9	1	1313.9		DQHH			1st ionisation of O	D1st_IEH		1313.9	1	1313.9		DQHH		0.499886
			2 C6+(g) 6 H(g) O(g) 12e–						-407023				2 C6+(g) 6 H(g) O(g) 12e–						-407116		0.500114
									kJmol–1										kJmol–1
		6th ionisation of C	D6th_IEH		47277	2	94554					6th ionisation of C	D6th_IEH		47277	2	94554
			2 C5+(g) 6 H(g) O(g) 10e–										2 C5+(g) 6 H(g) O(g) 10e–
		5th ionisation of C	D5th_IEH		37831	2	75662					5th ionisation of C	D5th_IEH		37831	2	75662
			2 C4+(g) 6 H(g) O(g) 8e–										2 C4+(g) 6 H(g) O(g) 8e–
		4th ionisation of C	D4th_IEH		6222.7	2	12445.4					4th ionisation of C	D4th_IEH		6222.7	2	12445.4
			2 C3+(g) 6 H(g) O(g) 6e–										2 C3+(g) 6 H(g) O(g) 6e–
		3rd ionisation of C	D3rd_IEH		4620.5	2	9241					3rd ionisation of C	D3rd_IEH		4620.5	2	9241
			2 C2+(g) 6 H(g) O(g) 4e–										2 C2+(g) 6 H(g) O(g) 4e–
		2nd ionisation of C	D2nd_IEH		2352.6	2	4705.2					2nd ionisation of C	D2nd_IEH		2352.6	2	4705.2
			2 C+(g) 6 H(g) O(g) 2e–										2 C+(g) 6 H(g) O(g) 2e–
																					IE data from:
		1st ionisation of C	D1st_IEH		1086.5	2	2173					1st ionisation of C	D1st_IEH		1086.5	2	2173				https://en.wikipedia.org/wiki/Ionization_energies_of_the_elements_(data_page)
			2 C(g) 6 H(g) O(g)										2 C(g) 6 H(g) O(g)								ATcT (Argonne) data
		Atomisation of H	DatH		218	6	1308					Atomisation of H	DatH		218	6	1308
			2 C(g) 6 H(g) O(g)										2 C(g) 6 H(g) O(g)
		Atomisation of C	DatH		717	2	1434					Atomisation of C	DatH		717	2	1434
			2 C(s) 3 H2(g) O(g)										2 C(s) 3 H2(g) O(g)
		Atomisation of O	DatH		248	1	248					Atomisation of O	DatH		248	1	248
			2 C(s) 3 H2(g) ½ O2(g)										2 C(s) 3 H2(g) ½ O2(g)
		Formation of dimethyl ether	DfH		-184.01	1	-184.01					Formation of ethanol	DfH		-277.05	1	-277.05
			CH3–O–CH3(g)										CH3CH2OH(l)
